# Supplementary material for: Draft genome of the Peruvian scallop Argopecten purpuratus
Source: PubMed Central journal article supplement (PMC5905365; doi:10.1093/gigascience/giy031), 2018-04-02
Supplement: giy031_giga-d-17-00315_original_submission.pdf [file giy031_giga-d-17-00315_original_submission.pdf]

|                                                      |                                                                                                                                                                                                                                                                                                                                                                                                                                                                                                                                                                                                                                                                                                                                                                                                                                                                                                                                                                                                                                                                                                                                                                                                                                  |                 |
|------------------------------------------------------|----------------------------------------------------------------------------------------------------------------------------------------------------------------------------------------------------------------------------------------------------------------------------------------------------------------------------------------------------------------------------------------------------------------------------------------------------------------------------------------------------------------------------------------------------------------------------------------------------------------------------------------------------------------------------------------------------------------------------------------------------------------------------------------------------------------------------------------------------------------------------------------------------------------------------------------------------------------------------------------------------------------------------------------------------------------------------------------------------------------------------------------------------------------------------------------------------------------------------------|-----------------|
| <b>Manuscript Number:</b>                            | GIGA-D-17-00315                                                                                                                                                                                                                                                                                                                                                                                                                                                                                                                                                                                                                                                                                                                                                                                                                                                                                                                                                                                                                                                                                                                                                                                                                  |                 |
| <b>Full Title:</b>                                   | Draft genome of the Peruvian scallop <i>Argopecten purpuratus</i>                                                                                                                                                                                                                                                                                                                                                                                                                                                                                                                                                                                                                                                                                                                                                                                                                                                                                                                                                                                                                                                                                                                                                                |                 |
| <b>Article Type:</b>                                 | Data Note                                                                                                                                                                                                                                                                                                                                                                                                                                                                                                                                                                                                                                                                                                                                                                                                                                                                                                                                                                                                                                                                                                                                                                                                                        |                 |
| <b>Funding Information:</b>                          | National Natural Science Foundation of China (31572618)                                                                                                                                                                                                                                                                                                                                                                                                                                                                                                                                                                                                                                                                                                                                                                                                                                                                                                                                                                                                                                                                                                                                                                          | Dr. Chunde Wang |
|                                                      | National Natural Science Foundation of China (41676152)                                                                                                                                                                                                                                                                                                                                                                                                                                                                                                                                                                                                                                                                                                                                                                                                                                                                                                                                                                                                                                                                                                                                                                          | Dr. Xiao Liu    |
|                                                      | Fund for Shandong Modern Agro-Industry Technology Research System (SDAIT-14)                                                                                                                                                                                                                                                                                                                                                                                                                                                                                                                                                                                                                                                                                                                                                                                                                                                                                                                                                                                                                                                                                                                                                     | Dr. Chunde Wang |
| <b>Abstract:</b>                                     | <p>Background: The Peruvian scallop, <i>Argopecten purpuratus</i>, is mainly cultured in Southern Chile and had been introduced into China in last century. Unlike other <i>Argopecten</i> scallops, the Peruvian scallop normally has a long life span of up to 7-10 years. Therefore, researchers have been employing it to develop hybrid vigor. Here, we performed whole genome sequencing, assembly, and gene annotation of the Peruvian scallop, with an important aim to develop genomic resources for genetic breeding in scallops. Findings: A total of 463.19-Gb (Gigabase) raw DNA reads were sequenced. The draft genome assembly of 724.78 Mb was generated (accounting for 81.87% of the estimated genome size 885.29 Mb), with a contig N50 size of 80.11 kb and scaffold N50 size of 1.02 Mb. Meanwhile, the repeat sequences were calculated to reach 33.74% of the whole genome, and a total of 26,256 protein-coding genes and 3,057 non-coding RNAs were predicted from the assembly. Conclusion: We generated a draft genome assembly of the Peruvian scallop, which will provide solid resource for further genetic breeding and evolutionary history analysis of this economically important scallop.</p> |                 |
| <b>Corresponding Author:</b>                         | Chunde Wang, Ph.D<br>Qingdao Agricultural University<br>CHINA                                                                                                                                                                                                                                                                                                                                                                                                                                                                                                                                                                                                                                                                                                                                                                                                                                                                                                                                                                                                                                                                                                                                                                    |                 |
| <b>Corresponding Author Secondary Information:</b>   |                                                                                                                                                                                                                                                                                                                                                                                                                                                                                                                                                                                                                                                                                                                                                                                                                                                                                                                                                                                                                                                                                                                                                                                                                                  |                 |
| <b>Corresponding Author's Institution:</b>           | Qingdao Agricultural University                                                                                                                                                                                                                                                                                                                                                                                                                                                                                                                                                                                                                                                                                                                                                                                                                                                                                                                                                                                                                                                                                                                                                                                                  |                 |
| <b>Corresponding Author's Secondary Institution:</b> |                                                                                                                                                                                                                                                                                                                                                                                                                                                                                                                                                                                                                                                                                                                                                                                                                                                                                                                                                                                                                                                                                                                                                                                                                                  |                 |
| <b>First Author:</b>                                 | Chao Li, Ph.D                                                                                                                                                                                                                                                                                                                                                                                                                                                                                                                                                                                                                                                                                                                                                                                                                                                                                                                                                                                                                                                                                                                                                                                                                    |                 |
| <b>First Author Secondary Information:</b>           |                                                                                                                                                                                                                                                                                                                                                                                                                                                                                                                                                                                                                                                                                                                                                                                                                                                                                                                                                                                                                                                                                                                                                                                                                                  |                 |
| <b>Order of Authors:</b>                             | Chao Li, Ph.D                                                                                                                                                                                                                                                                                                                                                                                                                                                                                                                                                                                                                                                                                                                                                                                                                                                                                                                                                                                                                                                                                                                                                                                                                    |                 |
|                                                      | Xiao Liu, D.Sc                                                                                                                                                                                                                                                                                                                                                                                                                                                                                                                                                                                                                                                                                                                                                                                                                                                                                                                                                                                                                                                                                                                                                                                                                   |                 |
|                                                      | Bin Ma, MSc                                                                                                                                                                                                                                                                                                                                                                                                                                                                                                                                                                                                                                                                                                                                                                                                                                                                                                                                                                                                                                                                                                                                                                                                                      |                 |
|                                                      | Guilong Liu, MSc                                                                                                                                                                                                                                                                                                                                                                                                                                                                                                                                                                                                                                                                                                                                                                                                                                                                                                                                                                                                                                                                                                                                                                                                                 |                 |
|                                                      | Qiong Shi, Ph.D                                                                                                                                                                                                                                                                                                                                                                                                                                                                                                                                                                                                                                                                                                                                                                                                                                                                                                                                                                                                                                                                                                                                                                                                                  |                 |
|                                                      | Chunde Wang, Ph.D                                                                                                                                                                                                                                                                                                                                                                                                                                                                                                                                                                                                                                                                                                                                                                                                                                                                                                                                                                                                                                                                                                                                                                                                                |                 |
| <b>Order of Authors Secondary Information:</b>       |                                                                                                                                                                                                                                                                                                                                                                                                                                                                                                                                                                                                                                                                                                                                                                                                                                                                                                                                                                                                                                                                                                                                                                                                                                  |                 |
| <b>Opposed Reviewers:</b>                            | Guofan Zhang<br>Institute of Oceanology, Chinese Academy of Sciences<br>guofanzhang2005@163.com<br>Conflict of interest                                                                                                                                                                                                                                                                                                                                                                                                                                                                                                                                                                                                                                                                                                                                                                                                                                                                                                                                                                                                                                                                                                          |                 |

|                                                                                                                                                                                                                                                                                                                                                                                                                                                                                                                                                         |                                                                                                                                               |
|---------------------------------------------------------------------------------------------------------------------------------------------------------------------------------------------------------------------------------------------------------------------------------------------------------------------------------------------------------------------------------------------------------------------------------------------------------------------------------------------------------------------------------------------------------|-----------------------------------------------------------------------------------------------------------------------------------------------|
|                                                                                                                                                                                                                                                                                                                                                                                                                                                                                                                                                         | <p>Li Li<br/>         Institute of Oceanology, Chinese Academy of Sciences<br/>         lili@qdio.ac.cn<br/>         Conflict of interest</p> |
| <b>Additional Information:</b>                                                                                                                                                                                                                                                                                                                                                                                                                                                                                                                          |                                                                                                                                               |
| <b>Question</b>                                                                                                                                                                                                                                                                                                                                                                                                                                                                                                                                         | <b>Response</b>                                                                                                                               |
| Are you submitting this manuscript to a special series or article collection?                                                                                                                                                                                                                                                                                                                                                                                                                                                                           | No                                                                                                                                            |
| <p><b>Experimental design and statistics</b></p> <p>Full details of the experimental design and statistical methods used should be given in the Methods section, as detailed in our <a href="#">Minimum Standards Reporting Checklist</a>. Information essential to interpreting the data presented should be made available in the figure legends.</p> <p>Have you included all the information requested in your manuscript?</p>                                                                                                                      | Yes                                                                                                                                           |
| <p><b>Resources</b></p> <p>A description of all resources used, including antibodies, cell lines, animals and software tools, with enough information to allow them to be uniquely identified, should be included in the Methods section. Authors are strongly encouraged to cite <a href="#">Research Resource Identifiers</a> (RRIDs) for antibodies, model organisms and tools, where possible.</p> <p>Have you included the information requested as detailed in our <a href="#">Minimum Standards Reporting Checklist</a>?</p>                     | Yes                                                                                                                                           |
| <p><b>Availability of data and materials</b></p> <p>All datasets and code on which the conclusions of the paper rely must be either included in your submission or deposited in <a href="#">publicly available repositories</a> (where available and ethically appropriate), referencing such data using a unique identifier in the references and in the “Availability of Data and Materials” section of your manuscript.</p> <p>Have you have met the above requirement as detailed in our <a href="#">Minimum Standards Reporting Checklist</a>?</p> | Yes                                                                                                                                           |

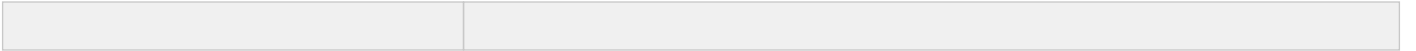

1 Draft genome of the Peruvian scallop *Argopecten purpuratus*

2 Chao Li<sup>1</sup>, Xiao Liu<sup>2</sup>, Bin Ma<sup>3</sup>, Guilong Liu<sup>1</sup>, Qiong Shi<sup>4</sup>, Chunde Wang<sup>1,\*</sup>

3  
4 <sup>1</sup>Marine Science and Engineering College, Qingdao Agricultural University, Qingdao  
5 266109, China

6 <sup>2</sup>Key Laboratory of Experimental Marine Biology, Institute of Oceanology, Chinese  
7 Academy of Sciences, Qingdao 266071, China

8 <sup>3</sup>Qingdao Oceanwide BioTech Co., Ltd., Qingdao 266101, China

9 <sup>4</sup> Shenzhen Key Lab of Marine Genomics, Guangdong Provincial Key Lab of  
10 Molecular Breeding in Marine Economic Animals, BGI Academy of Marine Sciences,  
11 BGI Marine, BGI, Shenzhen 518083, China

12  
13 \*Correspondence address. Professor Chunde Wang, Marine Science and Engineering  
14 College, Qingdao Agricultural University, Qingdao 266109, China (tel:  
15 +8613589227997; email: chundewang2007@163.com)

16  
17 Email addresses of all authors:

18 Chao Li, leochao@163.com

19 Xiao Liu, liuxiao@qdio.ac.cn

20 Bin Ma, hereiammabin@163.com

21 Guilong Liu, 969613442@qq.com

22 Qiong Shi, shiqiong@genomics.cn

23

1 24 **Abstract**

2  
3  
4 25 **Background:** The Peruvian scallop, *Argopecten purpuratus*, is mainly cultured in  
5  
6  
7 26 Southern Chile and had been introduced into China in last century. Unlike other  
8  
9  
10 27 *Argopecten* scallops, the Peruvian scallop normally has a long life span of up to 7-10  
11  
12  
13 28 years. Therefore, researchers have been employing it to develop hybrid vigor. Here,  
14  
15  
16 29 we performed whole genome sequencing, assembly, and gene annotation of the  
17  
18  
19 30 Peruvian scallop, with an important aim to develop genomic resources for genetic  
20  
21  
22 31 breeding in scallops. **Findings:** A total of 463.19-Gb (Gigabase) raw DNA reads were  
23  
24  
25 32 sequenced. The draft genome assembly of 724.78 Mb was generated (accounting for  
26  
27  
28 33 81.87% of the estimated genome size 885.29 Mb), with a contig N50 size of 80.11 kb  
29  
30  
31 34 and scaffold N50 size of 1.02 Mb. Meanwhile, the repeat sequences were calculated  
32  
33  
34 35 to reach 33.74% of the whole genome, and a total of 26,256 protein-coding genes and  
35  
36  
37 36 3,057 non-coding RNAs were predicted from the assembly. **Conclusion:** We  
38  
39  
40 37 generated a draft genome assembly of the Peruvian scallop, which will provide solid  
41  
42  
43 38 resource for further genetic breeding and evolutionary history analysis of this  
44  
45  
46 39 economically important scallop.

47 40  
48  
49  
50 41 **Keywords:** *Argopecten purpuratus*; Peruvian scallop; genome assembly; annotation;  
51  
52  
53 42 gene prediction; phylogenetic analysis

54 43  
55  
56  
57  
58 44  
59  
60  
61  
62  
63  
64  
65

1 45

2  
3 **46 Data description**

4  
5 **47 Introduction**

6  
7 **48** The Peruvian scallop (*Argopecten purpuratus*), also known as Chilean scallop, is  
8  
9  
10 **49** a medium-sized bivalve with a wide distribution in Peru and Chile [1]. In Chile, the  
11  
12  
13 **50** cultured scallops reach a commercial size of around 9 cm in shell height within 14-16  
14  
15  
16 **51** months [2]. It is a relatively stenotherm species as its natural habitat is largely under  
17  
18  
19 **52** the influence of upwelling currents from Antarctica [3]. Unlike other *Argopecten*  
20  
21  
22 **53** scallops, the Peruvian scallop normally has a long life span of up to 7-10 years [4, 5].  
23  
24  
25 **54** This scallop was introduced into China in the late 2000's and had played an important  
26  
27  
28 **55** role in stock improvement of *Argopecten* scallops via inter-specific hybridization [6, 7]  
29  
30  
31 **56** with bay scallops.

32 **57**

33  
34 **58 Whole genome sequencing**

35  
36 **59** Genomic DNA was extracted from muscle sample of a single *A. purpuratus*  
37  
38  
39 **60** (Figure 1), which was obtained from a local scallop farm in Laizhou, Shandong  
40  
41  
42 **61** Province, China. The traditional whole genome shotgun sequencing strategy was  
43  
44  
45 **62** applied. Six libraries with different insert length (250 bp, 450 bp, 2 kb, 5 kb, 10 kb,  
46  
47  
48 **63** and 20 kb) were constructed according to the standard protocol provided by Illumina  
49  
50  
51 **64** (San Diego, CA, USA), and sequenced on the Illumina HiSeq4000 platform with  
52  
53  
54 **65** paired-end 150 bp. In addition, SMRTbell libraries were prepared using either 10-kb or  
55  
56  
57 **66** 20-kb preparation protocols to optimize for the most high-quality and longest reads;  
58  
59  
60 **67** subsequent sequencing was performed on PacBio Sequel instrument with Sequel™  
61  
62  
63 **68** Sequencing Kit 1.2.1(Pacific Biosciences of California, USA). Finally, the 10X  
64  
65  
66 **69** Genomics library was constructed and sequenced with paired-end 150 bp on the Hiseq

1  
2  
3  
4  
5  
6  
7  
8  
9  
10  
11  
12  
13  
14  
15  
16  
17  
18  
19  
20  
21  
22  
23  
24  
25  
26  
27  
28  
29  
30  
31  
32  
33  
34  
35  
36  
37  
38  
39  
40  
41  
42  
43  
44  
45  
46  
47  
48  
49  
50  
51  
52  
53  
54  
55  
56  
57  
58  
59  
60  
61  
62  
63  
64  
65

70 platform. The Chromium™ Genome Solution (10X Genomics, USA) massively  
71 partitions and molecularly barcodes DNA using microfluidics, producing  
72 sequencing-ready libraries with >1,000,000 unique barcodes. In total, 463.19 gigabases  
73 (Gb) of raw reads were generated, including 75.72, 70.22, 19.21, 45.71, 28.34, 11.78,  
74 18.01 and 194.20 Gb from the 250-bp, 450-bp, 2-kb, 5-kb, 10-kb, 20-kb libraries,  
75 Pacbio sequencing, and 10X Genomics library respectively. The raw reads were  
76 trimmed by removing adaptor sequences, ambiguous nucleotides and low-quality reads,  
77 and then these cleaned high-quality reads were used for subsequent genome  
78 assembling.

## 79 80 Estimation of the genome size and sequencing coverage

81 The 17-mer frequency distribution analysis [8] was performed on all the  
82 remaining clean reads to estimate the genome size of the Peruvian scallop using the  
83 following formula: genome size = k-mer number / peak depth. A total number of 6.22  
84  $\times 10^{10}$  k-mers and the peak k-mer depth of 69 was employed to obtain the estimated  
85 genome size at 885.29 Mb (Table 1), and the estimated repeat sequencing ratio  
86 reaches 33.74%.

## 87 88 *De novo* genome assembly and quality assessment of *A. purpuratus* genome

89 All the pair-end Illumina reads were first assembled into scaffolds using Platanus  
90 [9], and then were applied to fill the gaps by GapCloser [10]. Subsequently, the  
91 Pacbio data were used for additional gap filling by PBJelly v14.1 with default  
92 parameters [11], and then all the Illumina reads were employed for two rounds to  
93 correct the genome assembly by Pilon v1.18 [12]. After that, the 10X linked-reads  
94 were used to link scaffolds by fragScaff [13]. Finally, a draft genome of 724.78 Mb

1  
2  
3  
4  
5  
6  
7  
8  
9  
10  
11  
12  
13  
14  
15  
16  
17  
18  
19  
20  
21  
22  
23  
24  
25  
26  
27  
28  
29  
30  
31  
32  
33  
34  
35  
36  
37  
38  
39  
40  
41  
42  
43  
44  
45  
46  
47  
48  
49  
50  
51  
52  
53  
54  
55  
56  
57  
58  
59  
60  
61  
62  
63  
64  
65

95 was assembled (accounting for 81.87% of the estimated genome size at 885.29 Mb),  
96 with a contig N50 size of 80.11 kb and a scaffold N50 size of 1.02 Mb (Table 1).

97 With this initial assembly, we applied the short insert library reads to map with  
98 the assembled genome using BWA software [14] to calculate the mapping ratio and  
99 assess the assembly integrity. In summary, 91.05% short reads were mapped onto the  
100 assembled genome with a coverage of 89.40%, indicating a good reliability of our  
101 genome assembly. CEGMA (Core Eukaryotic Genes Mapping Approach) defines a  
102 set of conserved protein families that occur in a wide range of eukaryotes, and  
103 presents a mapping procedure to accurately identify their exon-intron structures in a  
104 novel genomic sequence [15]. A protein is classified as complete if the alignment of  
105 the predicted protein to the HMM profile represents at least 70% of the original KOG  
106 domain, otherwise it is classified as partial. Through mapping to the 248 core  
107 eukaryotic genes, a total of 222 genes (89.52%) were identified. BUSCO  
108 (Benchmarking Universal Single-Copy Orthologs) provides quantitative measures for  
109 the assessment of genome assembly completeness, based on evolutionarily-informed  
110 expectations of gene content from near-universal single-copy orthologs [16]. We  
111 confirmed that 89% of the 843 single-copy genes were identified, indicating a good  
112 integrity of the genome assembly.

### 113 114 Repeat sequence analysis of the genome assembly

115 We searched transposable elements (TEs) in the assembled genome through  
116 *ab-initio* and homology based methods. For the former method, we applied  
117 RepeatModeler [17] (the parameter set as '--engine\_db wublast') to build a specific  
118 repeat database. For the latter method, we employed known repeat library (Rebase)  
119 [18] to identify repeats with RepeatMasker [19] (the parameter set as '-a -nolow



120 -no\_is -norna -parallel 3 -e wublast --pvalue 0.0001') and RepeatProteinMask (the  
121 parameter set as '-noLowSimple -pvalue 0.0001 -engine wublast') [19]. Tandem  
122 repeats finder (TRF) was used to find tandem repeats with the parameters setting as  
123 'Match = 2, Mismatching penalty = 7, Delta = 7, PM = 80, PI = 10, Minscore = 50,  
124 MaxPeriod = 2,000' [20]. Finally, we summarized that the total repeat sequences are  
125 294,496,811 bp, accounting for 40.63% of the assembled genome, and including  
126 11.46% of tandem repeats, which is consistent with our above-mentioned estimation  
127 (Table 2).

128

129 Gene annotation

130 (1) Annotation of protein coding genes

131 The annotation strategy for protein-coding genes integrated *de novo* prediction  
132 with homology and transcriptome data based evidence. Homology sequences from  
133 Pacific oyster (*Crassostrea gigas*), Mollusks (*Lottia gigantean*), Mosquito (*Anopheles*  
134 *gambiae*), Amphioxus (*Branchiostoma floridae*), Nematode (*Caenorhabditis elegans*),  
135 Ascidian (*Ciona intestinalis*), Fruit fly (*Drosophila melanogaster*), Leech (*Helobdella*  
136 *robusta*), Human (*Homo sapiens*), Octopuses (*Octopus bimaculoides*), Sea urchin  
137 (*Strongylocentrotus purpuratus*) were downloaded from Ensemble [21]. The protein  
138 sequences of homology species were aligned to the assembled genome with  
139 TBLASTn (e-value  $\leq 10^{-5}$ ) [22] and predicted gene structures with GeneWise (the  
140 parameter set as '-genesf') [23]. The transcriptome data from muscle, sequenced by  
141 Illumina sequencing platform, were mapped onto our genome assembly with Tophat  
142 (the parameter set as '--max-intron-length 500000 -m 2 --library-type fr-unstranded')  
143 [24] and assembled to gene model with Cufflinks (the parameter set as  
144 '--multi-read-correct') [25] according to the pair-end relationships and the overlap

145 between aligned reads. The *de novo* prediction of genes was carried out with four  
146 programs: Augustus (the parameter set as '-uniqueGeneId true  
147 --noInFrameStop=true --gff3 on -genemodel complete -strand both') [26], Genscan  
148 (the default parameter) [27], GlimmerHMM (the parameter set as '-f -g') [28] and  
149 SNAP (the default parameter) [29]. All evidences of gene model were integrated  
150 using EvidenceModeler (EVM) [29]. Finally, we identified 26,256 protein-coding  
151 genes in the Peruvian scallop genome. A total of 26,513 genes were predicted through  
152 the *de novo* method, 19,394 genes were annotated by RNA transcripts or raw RNA  
153 reads, and 15,608 genes were supported by homolog evidence. The average transcript  
154 length, CDS length and intron length were calculated to be 10,534 bp, 1,418 bp and  
155 1,505 bp respectively (Table 1).

156

### 157 (2) *Gene functional annotation*

158 Gene functions were predicted from the best BLASTP (e-value  $\leq 10^{-5}$ ) hits in  
159 SwissProt databases [30]. Gene domain annotation was performed by searching the  
160 InterPro database [31]. All genes were aligned against Kyoto Encyclopedia of Genes  
161 and Genomes (KEGG) [32] to identify the best hits for pathways. Gene Ontology (GO)  
162 terms for genes were obtained from the corresponding InterPro entry [33]. Finally,  
163 among these annotated genes, 70.3% encoded proteins showed homology to proteins  
164 in the SwissProt database, 91.1% were identified in the non-redundant (Nr) database,  
165 70.4% were identified in the KEGG database, 72.1% were identified in the InterPro,  
166 and a total of 92.1% could be mapped to the functional databases.

167

### 168 (3) *Non-coding RNA annotation*

169 The non-coding RNA genes, including miRNAs, rRNAs, snRNAs and tRNAs,  
170 were identified. The tRNAscan-SE software with eukaryote parameters [34] was  
171 employed to predict tRNA genes. The miRNA and snRNA genes in the assembled  
172 genome were extracted by INFERNAL software [35] against the Rfam database [36]  
173 with default parameters. Finally, 1,132 miRNAs, 1,664 tRNAs, 41 rRNAs and 220  
174 snRNAs were discovered from the Peruvian scallop genome.

175

#### 176 Global gene family classification

177 Protein-coding genes from the Peruvian scallop and other sequenced species,  
178 including Human (*H. sapiens*), Amphioxus (*B. floridae*), Fruit fly (*D. melanogaster*),  
179 Red flour beetle (*T. castaneum*), Nematode (*Caenorhabditis elegans*), brachiopod  
180 (*Lingula anatine*), *Helobdella robusta*, *Capitella teleta*, *Octopus bimaculoides*, *Lottia*  
181 *gigantea*, mollusk (*Aplysia californica*), Pacific Abalone (*Haliotis discus*), Pacific  
182 oyster (*C. gigas*), pearl oyster (*Pinctada fucata*), Yesso scallop (*Patinopecten*  
183 *yessoensis*), and cold seep mussel (*Bathymodiolus platifrons*), Brown mussel  
184 (*Modiolus philippinarum*) were analyzed. All data were downloaded from Ensemble  
185 [21] or NCBI [37]. For each protein-coding gene with alternative splicing isoforms,  
186 we only kept the longest protein sequence as the representative.

187 Gene family analysis was based on the homolog of gene sequences in related  
188 species, which was initially implemented by the alignment of an "all against all"  
189 BLASTP (with a cutoff of 1e-7), and subsequently the alignments with high-scoring  
190 segment pairs were conjoined for each gene pair by TreeFam [38]. To identify  
191 homologous gene pairs, we required more than 30% coverage of the aligned regions  
192 in both homologous genes. Finally, homologous genes were clustered into gene  
193 families by OrthoMCL [39] with the optimized parameter of '-inflation 1.5'. All

194 protein-coding genes from the examined 18 genomes were employed to assign gene  
195 families. In total, the protein-coding genes were classified into 45,268 families and  
196 108 strict single-copy orthologs (Figure 2).

#### 198 Phylogenetic analysis

199 Evolutionary analysis was performed using these single-copy protein-coding  
200 genes from the examined 18 species. Amino acid and nucleotide sequences of the  
201 ortholog genes were aligned by the multiple alignment software MUSCLE with  
202 default parameters [40]. A total number of 108 single-copy ortholog alignments were  
203 concatenated into a super alignment matrix of 242,085 nucleotides. A Maximum  
204 Likelihood method (ML) deduced tree was inferred based on the matrix of nucleotide  
205 sequences using RAxML with default nucleotide substitution  
206 model-PROTGAMMAAUTO [41]. Clade support was assessed using bootstrapping  
207 algorithm in the RAxML package with 100 alignment replicates (Figure 3) [42]. The  
208 constructed phylogenetic tree (Figure 3) indicated that the Peruvian scallop and Yesso  
209 scallop are clustered closely first and then clustered with Oysters and Mussels, which  
210 is in consistent with their putative evolution relationships [43, 44].

#### 212 The estimation of divergence time

213 The species divergence times were inferred with MCMCTree included in PAML  
214 v4.7a [45] with the parameter set as '--model 0 --rootage 1200 -clock 3', and  
215 evolutionary analysis was performed using single-copy protein-coding genes from the  
216 18 examined species. Based on the phylogenetic tree (Figure 3), we estimated that the  
217 divergence between the Peruvian scallop and Yesso scallops happened at 113.6 Mya  
218 ago.

219

220 **Conclusion**

221 In the present study, we reported the first whole genome sequencing, assembly and  
222 annotation of Peruvian scallop (*A. purpuratus*), an economically important bivalve in  
223 China. The assembled draft genome of 724.78 Mb accounts for 81.87% of the  
224 estimated genome size (885.29 Mb). A total of 26,256 protein-coding genes and 3,057  
225 non-coding RNAs were predicted from the assembly. In the coming future, this  
226 generated genome assembly will provide solid support for deep biological studies.  
227 With availability of these genomic data, subsequent development of genetic markers  
228 for further genetic selection and molecular breeding of scallops could be realized. Our  
229 current genome data will also definitely facilitate the genetic evolutionary history  
230 analysis for the abundant scallops in the world.

231

232 **Availability of Data**

233 Supporting raw data have been deposited in NCBI with the project accession  
234 PRJNA418203.

235

236 **Acknowledgements**

237 This work was supported by National Natural Science Foundation of China  
238 (31572618 granted to C. Wang and 41676152 granted to X. Liu) and the earmarked  
239 fund for Shandong Modern Agro-Industry Technology Research System (SDAIT-14)  
240 granted to C. Wang.

241

242 **Conflicts of interest**

243 The authors declare that they have no competing interests.

1  
2  
3  
4  
5  
6  
7  
8  
9  
10  
11  
12  
13  
14  
15  
16  
17  
18  
19  
20  
21  
22  
23  
24  
25  
26  
27  
28  
29  
30  
31  
32  
33  
34  
35  
36  
37  
38  
39  
40  
41  
42  
43  
44  
45  
46  
47  
48  
49  
50  
51  
52  
53  
54  
55  
56  
57  
58  
59  
60  
61  
62  
63  
64  
65

244

245 **Author's contributions**

246 C.W., X.L. and C.L. designed the project. B.M. and G.L. collected the samples and  
247 prepared the quality control. C.L., C.W. and X.L. were involved in the data analysis.  
248 C.W., X.L., C.L. and Q.S. wrote the manuscript. All authors read and approved the  
249 final manuscript.

250

251 **Reference**

- 252 1. Dall WH. The mollusca and branchiopoda. Report of dredging operation,  
253 Albatros' 1891. Bulletin Mollusca Comparative Zoology, 1909; 37: 147-294.
- 254 2. Gonzalez ML, Lopez DA, Perez MC, Riquelme VA, Uribe JM and Le PM.  
255 Growth and the scallop, *Argopecten purpuratus* (Lamarck, 1819), in southern  
256 Chile. Aquaculture. 1999; 175 3–4:307-16.
- 257 3. Genética D, Morfológica Y, Dos E, Del P, Argopecten P, De P, et al. Genetic  
258 and morphological differentiation between two pectinid populations of  
259 *Argopecten purpuratus* from the northern Chilean coast. Estudios  
260 Oceanológicos. 2001; 1:51-60.
- 261 4. Disalvo LH, Alarcon E, Martinez E and Uribe E. Progress in mass culture of  
262 *Chlamys (Argopecten) purpurata* Lamarck (1819) with notes on its natural  
263 history. Revista Chilena de Historia Natural. 1984, 57:35-45.
- 264 5. Estabrooks SL. The possible role of telomeres in the short life span of the bay  
265 scallop, *Argopecten irradians irradians* (Lamarck 1819). Journal of Shellfish  
266 Research. 2007; 26 2:307-13.
- 267 6. Wang C, Liu B, Li J and Liu S. Inter-specific hybridization between  
268 *Argopecten purpuratus* and *Argopecten irradians irradians*. Marine Sciences.  
269 2009; 33 10:84-75.
- 270 7. Wang C, Liu B, Li J, Liu S, Hu L, Fan X, et al. Introduction of the Peruvian  
271 scallop and its hybridization with the bay scallop in China. Aquaculture. 2011;  
272 310 3–4:380-7.
- 273 8. Marçais G and Kingsford C. A fast, lock-free approach for efficient parallel  
274 counting of occurrences of k-mers. Bioinformatics. 2011; 27 6:764.
- 275 9. Kajitani R, Toshimoto K, Noguchi H, Toyoda A, Ogura Y, Okuno M, et al.  
276 Efficient de novo assembly of highly heterozygous genomes from  
277 whole-genome shotgun short reads. Genome Research. 2014; 24 8:1384-95.
- 278 10. Luo R, Liu B, Xie Y, Li Z, Huang W, Yuan J, et al. SOAPdenovo2: an  
279 empirically improved memory-efficient short-read *de novo* assembler.  
280 Gigascience. 2012; 1 1:18.

1 281 11. English AC, Richards S, Han Y, Wang M, Vee V, Qu J, et al. Mind the gap:  
2 282 upgrading genomes with Pacific Biosciences RS long-read sequencing  
3 283 technology. Plos One. 2012; 7 11:e47768.  
4 284 12. Walker BJ, Abeel T, Shea T, Priest M, Abouelliel A, Sakthikumar S, et al.  
5 285 Pilon: an integrated tool for comprehensive microbial variant detection and  
6 286 genome assembly improvement. Plos One. 2014; 9 11:e112963.  
7 287 13. Adey A, Kitzman JO, Burton JN, Daza R, Kumar A, Christiansen L, et al. In  
8 288 vitro, long-range sequence information for *de novo* genome assembly via  
9 289 transposase contiguity. Genome Research. 2014; 24 12:2041.  
10 290 14. Li H and Durbin R. Fast and accurate short read alignment with  
11 291 Burrows-Wheeler transform. 2009; 25 14:1754-1760..  
12 292 15. Parra G, Bradnam K and Korf I. CEGMA: a pipeline to accurately annotate  
13 293 core genes in eukaryotic genomes. Bioinformatics. 2007; 23 9:1061.  
14 294 16. Simão FA, Waterhouse RM, Ioannidis P, Kriventseva EV and Zdobnov EM.  
15 295 BUSCO: assessing genome assembly and annotation completeness with  
16 296 single-copy orthologs. Bioinformatics. 2015; 31 19:3210.  
17 297 17. Grundmann N, Demester L and Makalowski W. TEclass-a tool for automated  
18 298 classification of unknown eukaryotic transposable elements. Bioinformatics.  
19 299 2009; 25 10:1329.  
20 300 18. Jurka J, Kapitonov VV, Pavlicek A, Klonowski P, et al. Repbase Update, a  
21 301 database of eukaryotic repetitive elements. Cytogenetic & Genome Research.  
22 302 2005 110:462-7.  
23 303 19. Tarailograovac M and Chen N. Using RepeatMasker to identify repetitive  
24 304 elements in genomic sequences. Current protocols in bioinformatics. 2009;  
25 305 Chapter 4 Unit 4:Unit 4.10.  
26 306 20. Benson G. Tandem repeats finder: a program to analyze DNA sequences.  
27 307 Nucleic Acids Research. 1999; 27 2:573-80.  
28 308 21. Kersey PJ, Allen JE, Allot A, Barba M, Boddu S, Bolt BJ, et al. Ensembl  
29 309 Genomes 2018: an integrated omics infrastructure for non-vertebrate species.  
30 310 Nucleic Acids Res. 2017; doi:10.1093/nar/gkx1011.  
31 311 22. Kent WJ. BLAT--the BLAST-like alignment tool. Genome Research. 2002;  
32 312 12 4:656-64.  
33 313 23. Birney E, Clamp M and Durbin R. GeneWise and Genomewise. Genome  
34 314 Research. 2004; 14 5:988.  
35 315 24. Trapnell C, Pachter L and Salzberg SL. TopHat: discovering splice junctions  
36 316 with RNA-Seq. Bioinformatics. 2009; 25 9:1105-11.  
37 317 25. Trapnell C, Williams BA, Pertea G, Mortazavi A, Kwan G, van Baren  
38 318 MJ, Salzberg SL, Wold BJ, Pachter L. Transcript assembly and quantification  
39 319 by RNA-Seq reveals unannotated transcripts and isoform switching during cell  
40 320 differentiation. Nat Biotechnol. 2010; 28 5:511-5.  
41 321 26. Stanke M and Waack S. Gene prediction with a hidden Markov model and a  
42 322 new intron submodel. Bioinformatics. 2003; 19 suppl\_2:215-25.  
43  
44  
45  
46  
47  
48  
49  
50  
51  
52  
53  
54  
55  
56  
57  
58  
59  
60  
61  
62  
63  
64  
65

- 1 323 27. Salamov AA and Solovyev VV. Ab initio gene finding in *Drosophila* genomic  
2 324 DNA. *Genome Research*. 2000; 10 4:516.
- 3 325 28. Majoros WH, Pertea M and Salzberg SL. TigrScan and GlimmerHMM: two  
4 326 open source ab initio eukaryotic gene-finders. *Bioinformatics*. 2004; 20  
5 327 16:2878-9.
- 6 328 29. Korf I. Gene finding in novel genomes. *Bmc Bioinformatics*. 2004; 5 1:59.
- 7 329 30. Bairoch A and Apweiler R. The SWISS-PROT protein sequence database and  
8 330 its supplement TrEMBL in 2000. *Nucleic Acids Research*. 2000; 28 1:45-8.
- 9 331 31. Mulder N and Apweiler R. InterPro and InterProScan: tools for protein  
10 332 sequence classification and comparison. *Methods in Molecular Biology*. 2007;  
11 333 396:59.
- 12 334 32. Kanehisa M and Goto S. KEGG: Kyoto Encyclopedia of genes and genomes.  
13 335 *Nucleic Acids Research*. 2000; 27 1:29-34.
- 14 336 33. Sherlock G. Gene Ontology: tool for the unification of biology. *Canadian*  
15 337 *Institute of Food Science & Technology Journal*. 2009; 22 4:415.
- 16 338 34. Lowe TM and Eddy SR. tRNAscan-SE: a program for improved detection of  
17 339 transfer RNA genes in genomic sequence. *Nucleic Acids Research*. 1997; 25  
18 340 5:955-64.
- 19 341 35. Nawrocki EP, Kolbe DL and Eddy SR. Infernal 1.0: inference of RNA  
20 342 alignments. *Bioinformatics*. 2009; 25 10:1335.
- 21 343 36. Griffiths-Jones S, Moxon S, Marshall M, Khanna A, Eddy SR and Bateman A.  
22 344 Rfam: annotating non-coding RNAs in complete genomes. *Nucleic Acids*  
23 345 *Research*. 2005; 33 Database issue:121-4.
- 24 346 37. Sayers EW, Barrett T, Benson DA, Bryant SH, Canese K, Chetvernin V, et al.  
25 347 Database resources of the national center for biotechnology information. In:  
26 348 *Haptics Symposium 2010*, pp.199-205.
- 27 349 38. Ruan J, Li H, Chen Z, Coghlan A, Coin LJ, Guo Y, et al. TreeFam: 2008  
28 350 Update. *Nucleic Acids Research*. 2008; 36 Database issue:D735-D40.
- 29 351 39. Li L, Stoeckert CJ and Roos DS. OrthoMCL: Identification of ortholog groups  
30 352 for eukaryotic genomes. *Genome Research*. 2003; 13 9:2178.
- 31 353 40. Edgar RC. MUSCLE: multiple sequence alignment with high accuracy and  
32 354 high throughput. *Nucleic Acids Research*. 2004; 32 5:1792-7.
- 33 355 41. Stamatakis A. RAxML Version 8: A tool for Phylogenetic Analysis and  
34 356 post-analysis of large phylogenies. *Bioinformatics*. 2014; 30 9:1312.
- 35 357 42. Stamatakis A, Ott M and Ludwig T. RAxML-OMP: An Efficient Program for  
36 358 Phylogenetic Inference on SMPs. In: *International Conference on Parallel*  
37 359 *Computing Technologies 2005*, pp.288-302.
- 38 360 43. Sun J, Zhang Y, Xu T, Mu H, Lan Y, Fields CJ, et al. Adaptation to deep-sea  
39 361 chemosynthetic environments as revealed by mussel genomes. *Nature Ecology*  
40 362 *& Evolution*. 2017;1 5:121.
- 41  
42  
43  
44  
45  
46  
47  
48  
49  
50  
51  
52  
53  
54  
55  
56  
57  
58  
59  
60  
61  
62  
63  
64  
65



363 44. Shi W, Zhang J, Jiao W, Ji L, Xun X, Yan S, et al. Scallop genome provides  
 364 insights into evolution of bilaterian karyotype and development. *Nature*  
 365 *Ecology & Evolution*. 2017; 1 5:120.  
 366 45. Yang Z. PAML: a program package for phylogenetic analysis by maximum  
 367 likelihood. *Computer Applications in the Biosciences Cabios*. 1997; 13 5:555.

371 Table 1. Summary of the Peruvian scallop genome assembly and annotation

| <b>Genome assembly</b>         | <b>Parameter</b> |
|--------------------------------|------------------|
| Contig N50 size (kb)           | 80.11            |
| Scaffold N50 size (Mb)         | 1.02             |
| Estimated genome size (Mb)     | 885.29           |
| Assembled genome size (Mb)     | 724.78           |
| Genome coverage (×)            | 303.83           |
| The longest scaffold (bp)      | 11,125,544       |
| <b>Genome annotation</b>       | <b>Parameter</b> |
| Protein-coding gene number     | 26,256           |
| Average transcript length (kb) | 10.53            |
| Average CDS length (bp)        | 1,418.29         |
| Average intron length (bp)     | 1,505.92         |
| Average exon length (bp)       | 201.09           |
| Average exons per gene         | 7.05             |

372  
 373  
 374  
 375  
 376

1 377  
 2  
 3  
 4 378  
 5  
 6 379  
 7  
 8  
 9 380  
 10  
 11  
 12 381  
 13  
 14  
 15 382  
 16  
 17  
 18  
 19  
 20  
 21  
 22  
 23  
 24  
 25 383  
 26 384  
 27  
 28 385  
 29  
 30  
 31 386  
 32  
 33  
 34 387  
 35  
 36  
 37 388  
 38  
 39  
 40 389  
 41  
 42  
 43 390  
 44  
 45  
 46 391  
 47  
 48  
 49 392  
 50  
 51 393  
 52  
 53  
 54 394  
 55  
 56  
 57 395  
 58  
 59  
 60 396  
 61  
 62  
 63  
 64  
 65

Table 2. The prediction of repeats elements in the Peruvian scallop genome.

| Type              | Repeat Size (bp) | % of genome |
|-------------------|------------------|-------------|
| TRF               | 83,037,380       | 11.46       |
| RepeatMasker      | 237,471,691      | 32.76       |
| RepeatProteinMask | 21,719,425       | 3.00        |
| Total             | 294,496,811      | 40.63       |

1 397

2

3 398

4

5 399

6

7 400

8

9 401

10

11 402

12

13

14

15

16

17

18

19

20

21

22

23

24

25

26

27

28

29

30

31

32

33

34

35

36

37

38

39

40

41

42

43

44

45

46

47

48

49

50

51

52

53

**Figure 1** Picture of a representative Peruvian scallop in China.

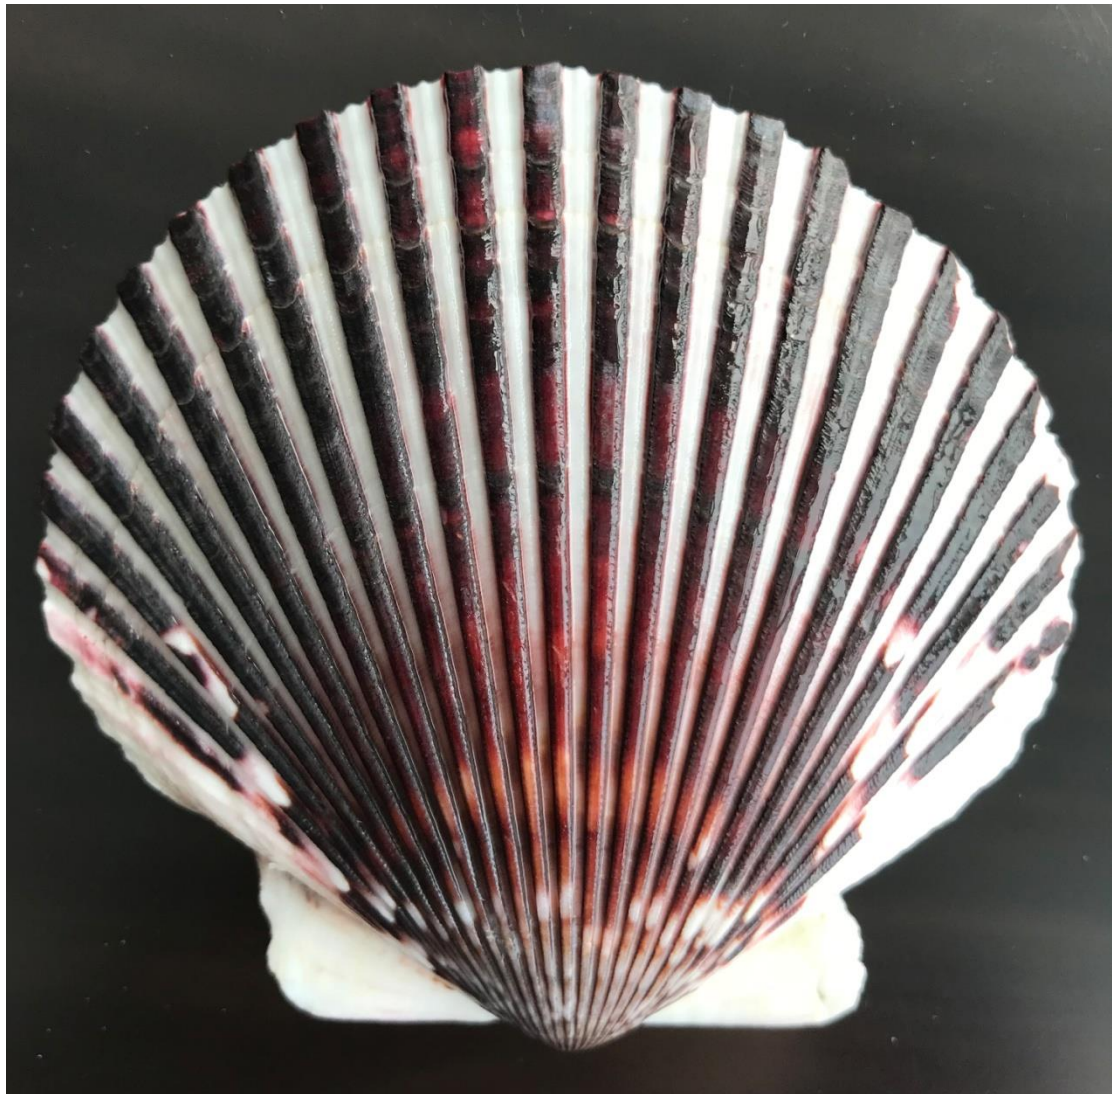

54 403

55

56 404

57

58 405

59

60

61

62

63

64

65

1 406

2 407

3 408

4 409

5 410

6 **Figure 2. Distribution of genes in different species.** Abbreviations: Aca, *Aplysia californica*; Apu, *Argopecten purpuratus*; Bfl, *Branchiostoma floridae*; Bpl, *Bathymodiolus platifrons*; Cel, *Caenorhabditis elegans*; Cgi, *Crassostrea gigas*; Cte, *Capitella teleta*; Dme, *Drosophila melanogaster*; Has, *Homo sapiens*; Hdi, *Haliotis discus*; Hro, *Helobdella robusta*; Lan, *Lingula anatine*; Lgi, *Lottia gigantean*; Mph, *Modiolus philippinarum*; Obi, *Octopus bimaculoides*; Pfu, *Pinctada fucata*; Tca, *Tribolium castaneum*.

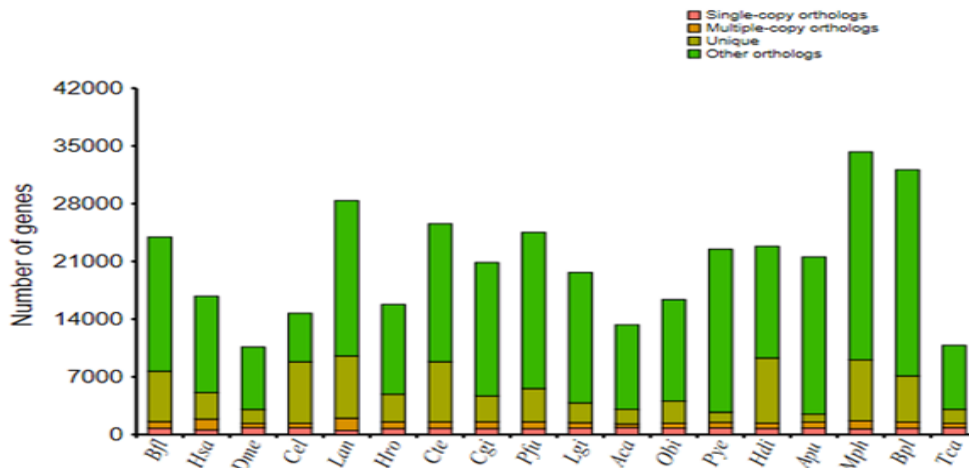

7 418

8 419

9 420

10 421

11 422

12 423

13 424

14 425

15  
16  
17  
18  
19  
20  
21  
22  
23  
24  
25  
26  
27  
28  
29  
30  
31  
32  
33  
34  
35  
36  
37  
38  
39  
40  
41  
42  
43  
44  
45  
46  
47  
48  
49  
50  
51  
52  
53  
54  
55  
56  
57  
58  
59  
60  
61  
62  
63  
64  
65

1 426  
2  
3  
4 427  
5  
6 428  
7  
8  
9 429  
10

11 **Figure 3. Bootstrap support of phylogenetic tree.** A ML tree was constructed by  
12 RAxML based on 108 single-copy protein-coding genes of the related species. The  
13 total number of bootstrap was 100.  
14  
15

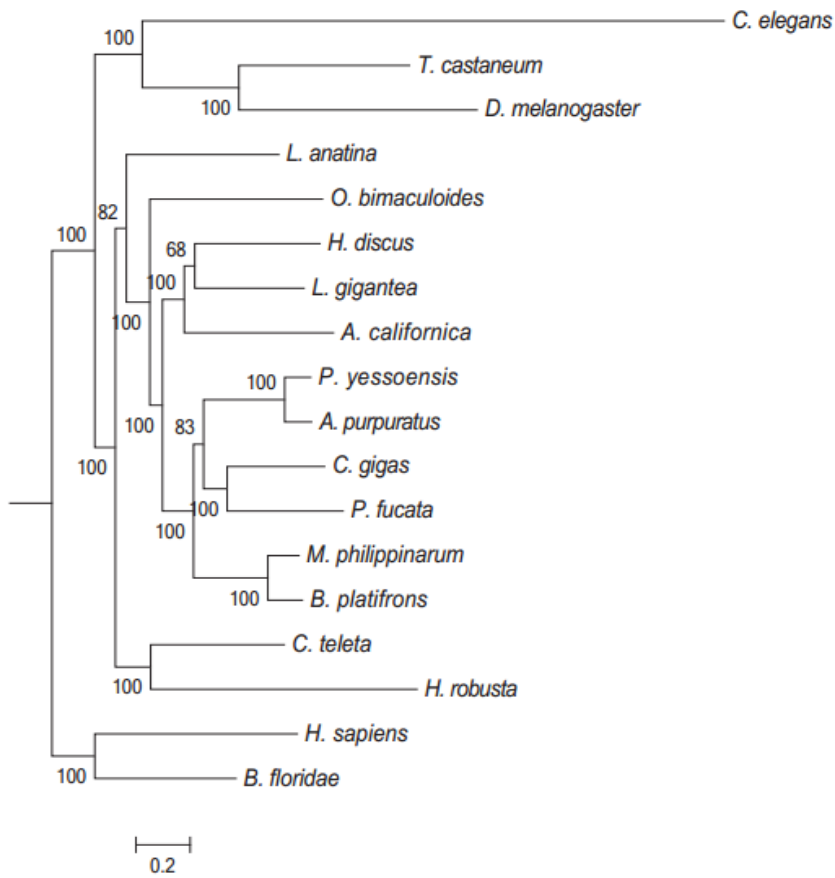

433  
434  
435  
436  
437  
438
